# Supplementary material for: Chronic Postoperative Pain After Hysterectomy for Endometrial Cancer: A Metabolic Profiling Study
Source: PubMed Central journal article supplement — Mol Pain. 2020 May 6;16:1744806920923885. doi: 10.1177/1744806920923885 (PMC7227146; doi:10.1177/1744806920923885), 2020-05-06
Supplement: sj-pdf-1-mpx-10.1177_1744806920923885.pdf [file sj-pdf-1-mpx-10.1177_1744806920923885.pdf]

Table 1

| No | Metabolites                                         | Short name     | Group                          |
|----|-----------------------------------------------------|----------------|--------------------------------|
| 1  | Total cholesterol                                   | Total-C        | Cholesterol                    |
| 2  | VLDL cholesterol                                    | VLDL-C         | Cholesterol                    |
| 3  | Remnant cholesterol (non-HDL, non-LDL -cholesterol) | Remnant-C      | Cholesterol                    |
| 4  | LDL cholesterol                                     | LDL-C          | Cholesterol                    |
| 5  | HDL cholesterol                                     | HDL-C          | Cholesterol                    |
| 6  | HDL2 cholesterol                                    | HDL2-C         | Cholesterol                    |
| 7  | HDL3 cholesterol                                    | HDL3-C         | Cholesterol                    |
| 8  | Total esterified cholesterol                        | Esterified-C   | Cholesterol                    |
| 9  | Total free cholesterol                              | Free-C         | Cholesterol                    |
| 10 | Total triglycerides                                 | Total-TG       | Glycerides and phospholipids   |
| 11 | Triglycerides in VLDL                               | VLDL-TG        | Glycerides and phospholipids   |
| 12 | Triglycerides in LDL                                | LDL-TG         | Glycerides and phospholipids   |
| 13 | Triglycerides in HDL                                | HDL-TG         | Glycerides and phospholipids   |
| 14 | Phosphoglycerides                                   | Phosphoglyc    | Glycerides and phospholipids   |
| 15 | Ratio of triglycerides to phosphoglycerides         | TG/PG          | Glycerides and phospholipids   |
| 16 | Total cholines                                      | Cholines       | Glycerides and phospholipids   |
| 17 | Phosphatidylcholines                                | Phosphatidylc  | Glycerides and phospholipids   |
| 18 | Sphingomyelins                                      | Sphingomyelins | Glycerides and phospholipids   |
| 19 | Apolipoprotein B                                    | ApoB           | Apolipoproteins                |
| 20 | Apolipoprotein A1                                   | ApoA1          | Apolipoproteins                |
| 21 | Total fatty acids                                   | Total-FA       | Fatty acids                    |
| 22 | Degree of unsaturation                              | Unsaturation   | Fatty acids                    |
| 23 | Omega-3 fatty acids                                 | Omega-3        | Fatty acids                    |
| 24 | Omega-6 fatty acids                                 | Omega-6        | Fatty acids                    |
| 25 | Polyunsaturated fatty acids                         | PUFA           | Fatty acids                    |
| 26 | Monounsaturated fatty acids                         | MUFA           | Fatty acids                    |
| 27 | Saturated fatty acids                               | SFA            | Fatty acids                    |
| 28 | Linoleic acid                                       | LA             | Fatty acids                    |
| 29 | Docosahexaenoic acid                                | DHA            | Fatty acids                    |
| 30 | Alanine                                             | Ala            | Amino acids                    |
| 31 | Glutamine                                           | Gln            | Amino acids                    |
| 32 | Glycine                                             | Gly            | Amino acids                    |
| 33 | Histidine                                           | His            | Amino acids                    |
| 34 | Isoleucine                                          | Ile            | Amino acids                    |
| 35 | Leucine                                             | Leu            | Amino acids                    |
| 36 | Valine                                              | Val            | Amino acids                    |
| 37 | Phenylalanine                                       | Phe            | Amino acids                    |
| 38 | Tyrosine                                            | Tyr            | Amino acids                    |
| 39 | Glucose                                             | Glucose        | Glycolysis related metabolites |
| 40 | Lactate                                             | Lactate        | Glycolysis related metabolites |
| 41 | Pyruvate                                            | Pyruvate       | Glycolysis related metabolites |

|    |                                                                  |              |                                |
|----|------------------------------------------------------------------|--------------|--------------------------------|
| 42 | Citrate                                                          | Citrate      | Glycolysis related metabolites |
| 43 | Glycerol                                                         | Glycerol     | Glycolysis related metabolites |
| 44 | Acetate                                                          | Acetate      | Ketone bodies                  |
| 45 | Acetoacetate                                                     | Acetoacetate | Ketone bodies                  |
| 46 | Beta-hydroxybutyrate                                             | bOHbutyrate  | Ketone bodies                  |
| 47 | Creatinine                                                       | Creatinine   | Fluid balance                  |
| 48 | Albumin                                                          | Albumin      | Fluid balance                  |
| 49 | Glycoprotein acetyls                                             | GlycA        | Inflammation                   |
| 50 | Concentration of chylomicrons and extremely large VLDL particles | XXL-VLDL-P   | Lipoprotein subclasses         |
| 51 | Total lipids in chylomicrons and extremely large VLDL            | XXL-VLDL-L   | Lipoprotein subclasses         |
| 52 | Phospholipids in chylomicrons and extremely large VLDL           | XXL-VLDL-PL  | Lipoprotein subclasses         |
| 53 | Cholesterol in chylomicrons and extremely large VLDL             | XXL-VLDL-C   | Lipoprotein subclasses         |
| 54 | Cholesteryl esters in chylomicrons and extremely large VLDL      | XXL-VLDL-CE  | Lipoprotein subclasses         |
| 55 | Free cholesterol in chylomicrons and extremely large VLDL        | XXL-VLDL-FC  | Lipoprotein subclasses         |
| 56 | Triglycerides in chylomicrons and extremely large VLDL           | XXL-VLDL-TG  | Lipoprotein subclasses         |
| 57 | Concentration of very large VLDL particles                       | XL-VLDL-P    | Lipoprotein subclasses         |
| 58 | Total lipids in very large VLDL                                  | XL-VLDL-L    | Lipoprotein subclasses         |
| 59 | Phospholipids in very large VLDL                                 | XL-VLDL-PL   | Lipoprotein subclasses         |
| 60 | Cholesterol in very large VLDL                                   | XL-VLDL-C    | Lipoprotein subclasses         |
| 61 | Cholesteryl esters in very large VLDL                            | XL-VLDL-CE   | Lipoprotein subclasses         |
| 62 | Free cholesterol in very large VLDL                              | XL-VLDL-FC   | Lipoprotein subclasses         |
| 63 | Triglycerides in very large VLDL                                 | XL-VLDL-TG   | Lipoprotein subclasses         |
| 64 | Concentration of large VLDL particles                            | L-VLDL-P     | Lipoprotein subclasses         |
| 65 | Total lipids in large VLDL                                       | L-VLDL-L     | Lipoprotein subclasses         |
| 66 | Phospholipids in large VLDL                                      | L-VLDL-PL    | Lipoprotein subclasses         |
| 67 | Cholesterol in large VLDL                                        | L-VLDL-C     | Lipoprotein subclasses         |
| 68 | Cholesteryl esters in large VLDL                                 | L-VLDL-CE    | Lipoprotein subclasses         |
| 69 | Free cholesterol in large VLDL                                   | L-VLDL-FC    | Lipoprotein subclasses         |
| 70 | Triglycerides in large VLDL                                      | L-VLDL-TG    | Lipoprotein subclasses         |
| 71 | Concentration of medium VLDL particles                           | M-VLDL-P     | Lipoprotein subclasses         |
| 72 | Total lipids in medium VLDL                                      | M-VLDL-L     | Lipoprotein subclasses         |
| 73 | Phospholipids in medium VLDL                                     | M-VLDL-PL    | Lipoprotein subclasses         |
| 74 | Cholesterol in medium VLDL                                       | M-VLDL-C     | Lipoprotein subclasses         |
| 75 | Cholesteryl esters in medium VLDL                                | M-VLDL-CE    | Lipoprotein subclasses         |
| 76 | Free cholesterol in medium VLDL                                  | M-VLDL-FC    | Lipoprotein subclasses         |
| 77 | Triglycerides in medium VLDL                                     | M-VLDL-TG    | Lipoprotein subclasses         |
| 78 | Concentration of small VLDL particles                            | S-VLDL-P     | Lipoprotein subclasses         |
| 79 | Total lipids in small VLDL                                       | S-VLDL-L     | Lipoprotein subclasses         |
| 80 | Phospholipids in small VLDL                                      | S-VLDL-PL    | Lipoprotein subclasses         |
| 81 | Cholesterol in small VLDL                                        | S-VLDL-C     | Lipoprotein subclasses         |
| 82 | Cholesteryl esters in small VLDL                                 | S-VLDL-CE    | Lipoprotein subclasses         |
| 83 | Free cholesterol in small VLDL                                   | S-VLDL-FC    | Lipoprotein subclasses         |
| 84 | Triglycerides in small VLDL                                      | S-VLDL-TG    | Lipoprotein subclasses         |
| 85 | Concentration of very small VLDL particles                       | XS-VLDL-P    | Lipoprotein subclasses         |

|     |                                           |            |                        |
|-----|-------------------------------------------|------------|------------------------|
| 86  | Total lipids in very small VLDL           | XS-VLDL-L  | Lipoprotein subclasses |
| 87  | Phospholipids in very small VLDL          | XS-VLDL-PL | Lipoprotein subclasses |
| 88  | Cholesterol in very small VLDL            | XS-VLDL-C  | Lipoprotein subclasses |
| 89  | Cholesteryl esters in very small VLDL     | XS-VLDL-CE | Lipoprotein subclasses |
| 90  | Free cholesterol in very small VLDL       | XS-VLDL-FC | Lipoprotein subclasses |
| 91  | Triglycerides in very small VLDL          | XS-VLDL-TG | Lipoprotein subclasses |
| 92  | Concentration of IDL particles            | IDL-P      | Lipoprotein subclasses |
| 93  | Total lipids in IDL                       | IDL-L      | Lipoprotein subclasses |
| 94  | Phospholipids in IDL                      | IDL-PL     | Lipoprotein subclasses |
| 95  | Cholesterol in IDL                        | IDL-C      | Lipoprotein subclasses |
| 96  | Cholesteryl esters in IDL                 | IDL-CE     | Lipoprotein subclasses |
| 97  | Free cholesterol in IDL                   | IDL-FC     | Lipoprotein subclasses |
| 98  | Triglycerides in IDL                      | IDL-TG     | Lipoprotein subclasses |
| 99  | Concentration of large LDL particles      | L-LDL-P    | Lipoprotein subclasses |
| 100 | Total lipids in large LDL                 | L-LDL-L    | Lipoprotein subclasses |
| 101 | Phospholipids in large LDL                | L-LDL-PL   | Lipoprotein subclasses |
| 102 | Cholesterol in large LDL                  | L-LDL-C    | Lipoprotein subclasses |
| 103 | Cholesteryl esters in large LDL           | L-LDL-CE   | Lipoprotein subclasses |
| 104 | Free cholesterol in large LDL             | L-LDL-FC   | Lipoprotein subclasses |
| 105 | Triglycerides in large LDL                | L-LDL-TG   | Lipoprotein subclasses |
| 106 | Concentration of medium LDL particles     | M-LDL-P    | Lipoprotein subclasses |
| 107 | Total lipids in medium LDL                | M-LDL-L    | Lipoprotein subclasses |
| 108 | Phospholipids in medium LDL               | M-LDL-PL   | Lipoprotein subclasses |
| 109 | Cholesterol in medium LDL                 | M-LDL-C    | Lipoprotein subclasses |
| 110 | Cholesteryl esters in medium LDL          | M-LDL-CE   | Lipoprotein subclasses |
| 111 | Free cholesterol in medium LDL            | M-LDL-FC   | Lipoprotein subclasses |
| 112 | Triglycerides in medium LDL               | M-LDL-TG   | Lipoprotein subclasses |
| 113 | Concentration of small LDL particles      | S-LDL-P    | Lipoprotein subclasses |
| 114 | Total lipids in small LDL                 | S-LDL-L    | Lipoprotein subclasses |
| 115 | Phospholipids in small LDL                | S-LDL-PL   | Lipoprotein subclasses |
| 116 | Cholesterol in small LDL                  | S-LDL-C    | Lipoprotein subclasses |
| 117 | Cholesteryl esters in small LDL           | S-LDL-CE   | Lipoprotein subclasses |
| 118 | Free cholesterol in small LDL             | S-LDL-FC   | Lipoprotein subclasses |
| 119 | Triglycerides in small LDL                | S-LDL-TG   | Lipoprotein subclasses |
| 120 | Concentration of very large HDL particles | XL-HDL-P   | Lipoprotein subclasses |
| 121 | Total lipids in very large HDL            | XL-HDL-L   | Lipoprotein subclasses |
| 122 | Phospholipids in very large HDL           | XL-HDL-PL  | Lipoprotein subclasses |
| 123 | Cholesterol in very large HDL             | XL-HDL-C   | Lipoprotein subclasses |
| 124 | Cholesteryl esters in very large HDL      | XL-HDL-CE  | Lipoprotein subclasses |
| 125 | Free cholesterol in very large HDL        | XL-HDL-FC  | Lipoprotein subclasses |
| 126 | Triglycerides in very large HDL           | XL-HDL-TG  | Lipoprotein subclasses |
| 127 | Concentration of large HDL particles      | L-HDL-P    | Lipoprotein subclasses |
| 128 | Total lipids in large HDL                 | L-HDL-L    | Lipoprotein subclasses |
| 129 | Phospholipids in large HDL                | L-HDL-PL   | Lipoprotein subclasses |

|     |                                       |          |                        |
|-----|---------------------------------------|----------|------------------------|
| 130 | Cholesterol in large HDL              | L-HDL-C  | Lipoprotein subclasses |
| 131 | Cholesteryl esters in large HDL       | L-HDL-CE | Lipoprotein subclasses |
| 132 | Free cholesterol in large HDL         | L-HDL-FC | Lipoprotein subclasses |
| 133 | Triglycerides in large HDL            | L-HDL-TG | Lipoprotein subclasses |
| 134 | Concentration of medium HDL particles | M-HDL-P  | Lipoprotein subclasses |
| 135 | Total lipids in medium HDL            | M-HDL-L  | Lipoprotein subclasses |
| 136 | Phospholipids in medium HDL           | M-HDL-PL | Lipoprotein subclasses |
| 137 | Cholesterol in medium HDL             | M-HDL-C  | Lipoprotein subclasses |
| 138 | Cholesteryl esters in medium HDL      | M-HDL-CE | Lipoprotein subclasses |
| 139 | Free cholesterol in medium HDL        | M-HDL-FC | Lipoprotein subclasses |
| 140 | Triglycerides in medium HDL           | M-HDL-TG | Lipoprotein subclasses |
| 141 | Concentration of small HDL particles  | S-HDL-P  | Lipoprotein subclasses |
| 142 | Total lipids in small HDL             | S-HDL-L  | Lipoprotein subclasses |
| 143 | Phospholipids in small HDL            | S-HDL-PL | Lipoprotein subclasses |
| 144 | Cholesterol in small HDL              | S-HDL-C  | Lipoprotein subclasses |
| 145 | Cholesteryl esters in small HDL       | S-HDL-CE | Lipoprotein subclasses |
| 146 | Free cholesterol in small HDL         | S-HDL-FC | Lipoprotein subclasses |
| 147 | Triglycerides in small HDL            | S-HDL-TG | Lipoprotein subclasses |
